# Supplementary material for: Palbociclib has no clinically relevant effect on the QTc interval in patients with advanced breast cancer
Source: PubMed Central journal article supplement — Anticancer Drugs. 2018 Feb 15;29(3):271–80. doi: 10.1097/CAD.0000000000000589 (PMC5821476; doi:10.1097/cad.0000000000000589), 2018-02-15
Supplement: cad-29-271-s003.pdf [file cad-29-271-s003.pdf]

**Supplemental Digital Content 3.** Fig. 1: Relationship between QTc vs RR intervals using pre-dose data for (A) QTcS, (B) QTcF, and (C) QTcB in QTc evaluation population.

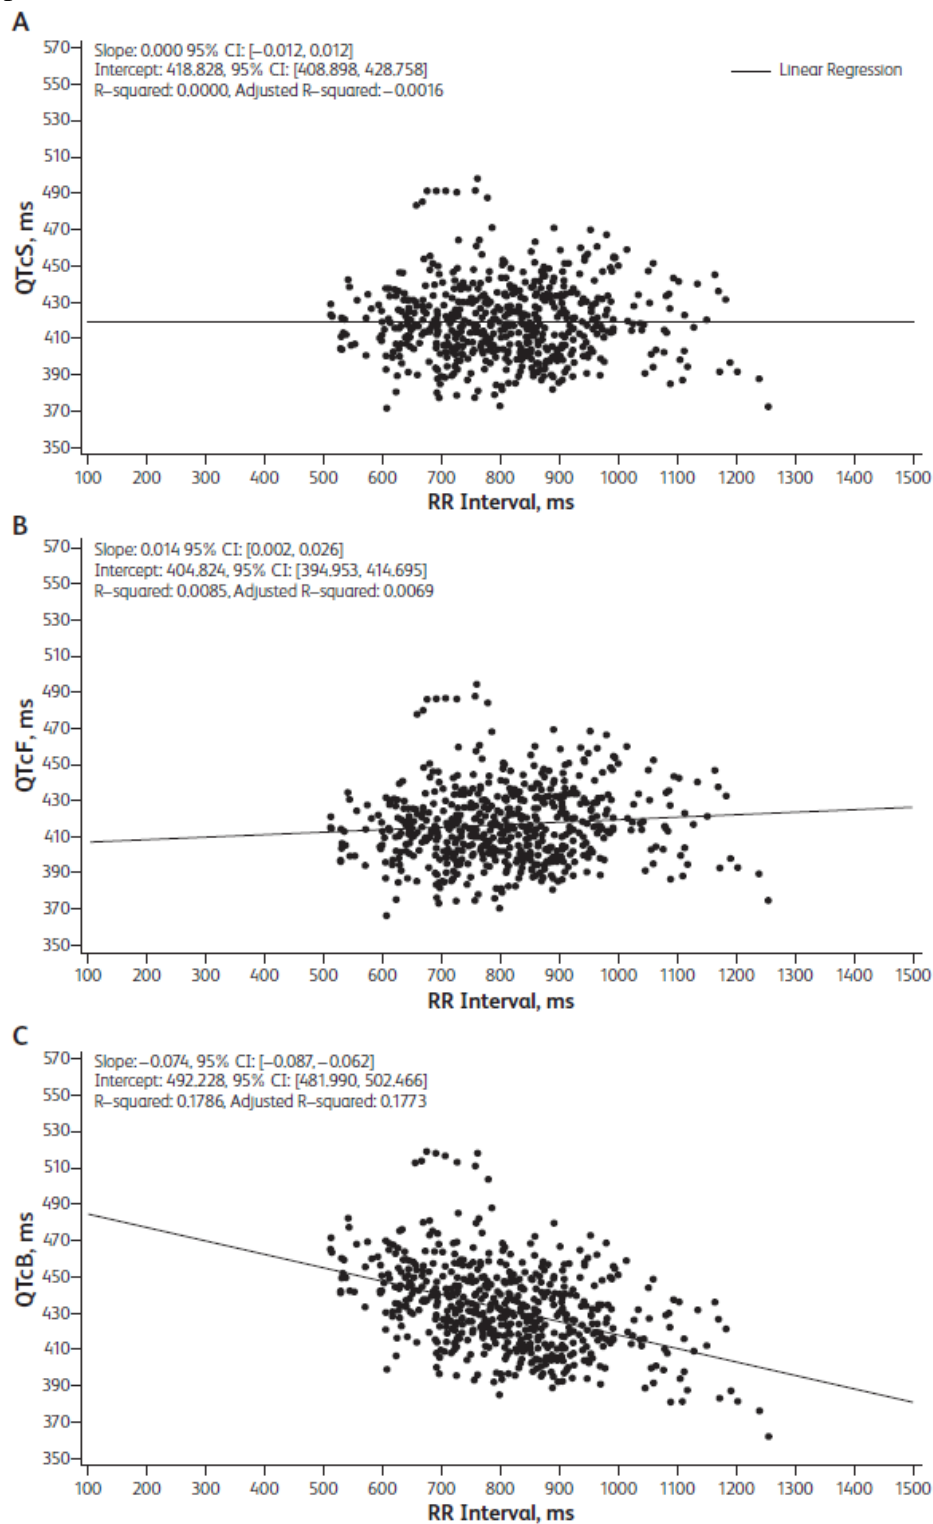

**Supplemental Digital Content 3. Fig. 2:** Relationship between QTc vs RR intervals using predose data for (A) QTcS, (B) QTcF, and (C) QTcB in safety-analysis population.

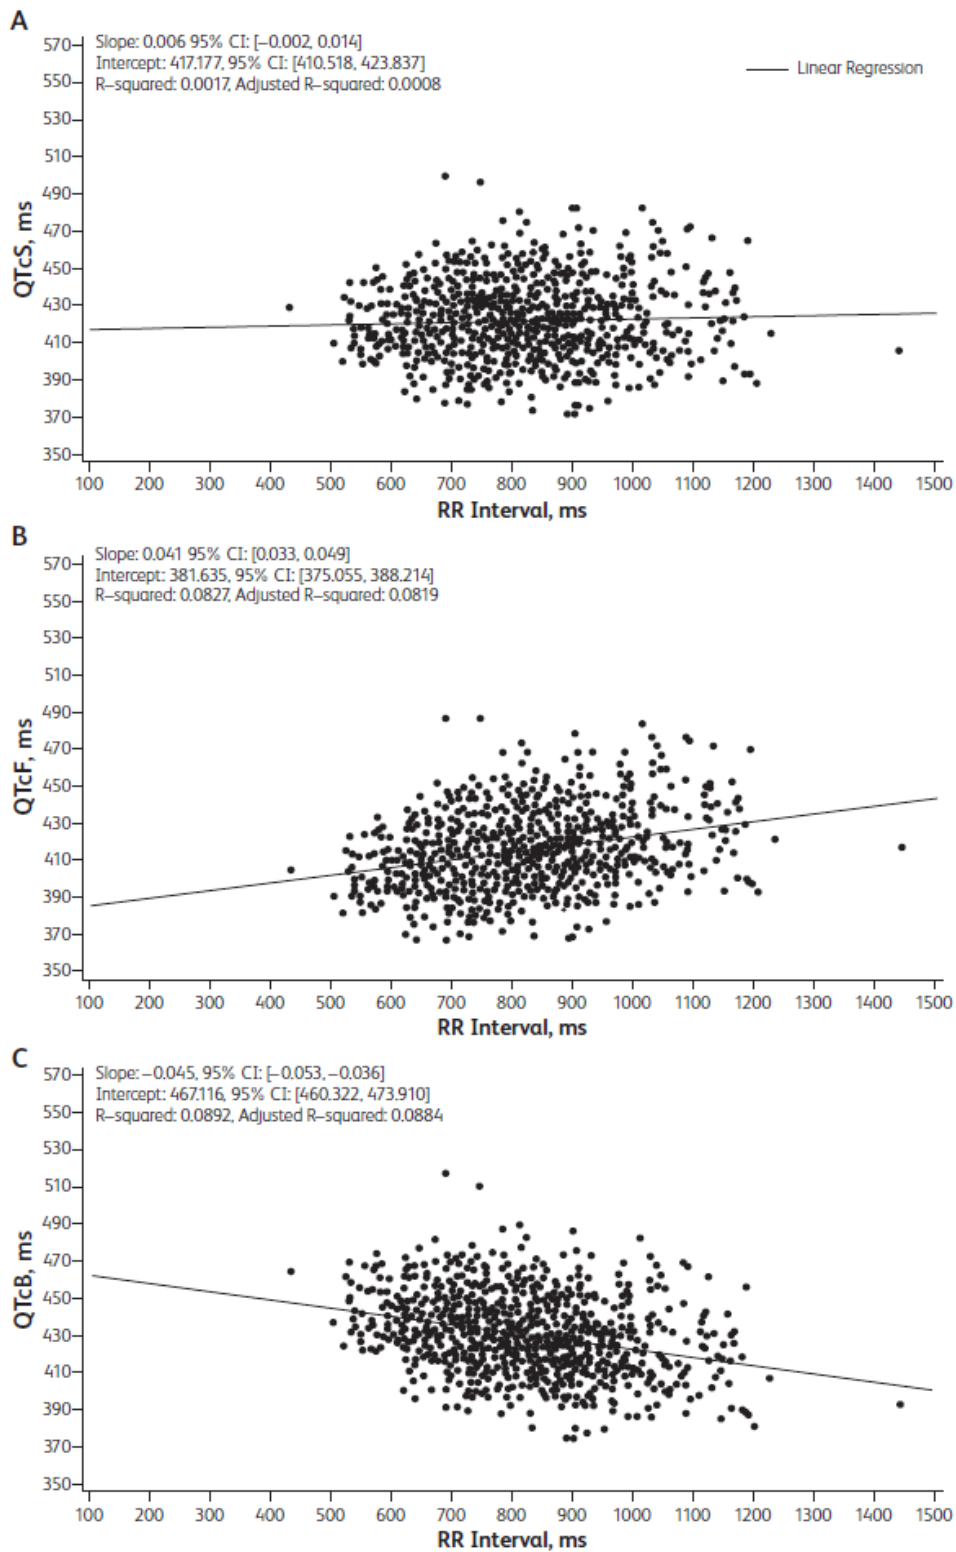

**Supplemental Digital Content 3. Fig. 3:** Change from baseline in (A) QTcS and (B) QTcF over time in the palbociclib plus letrozole arm in safety-analysis population.

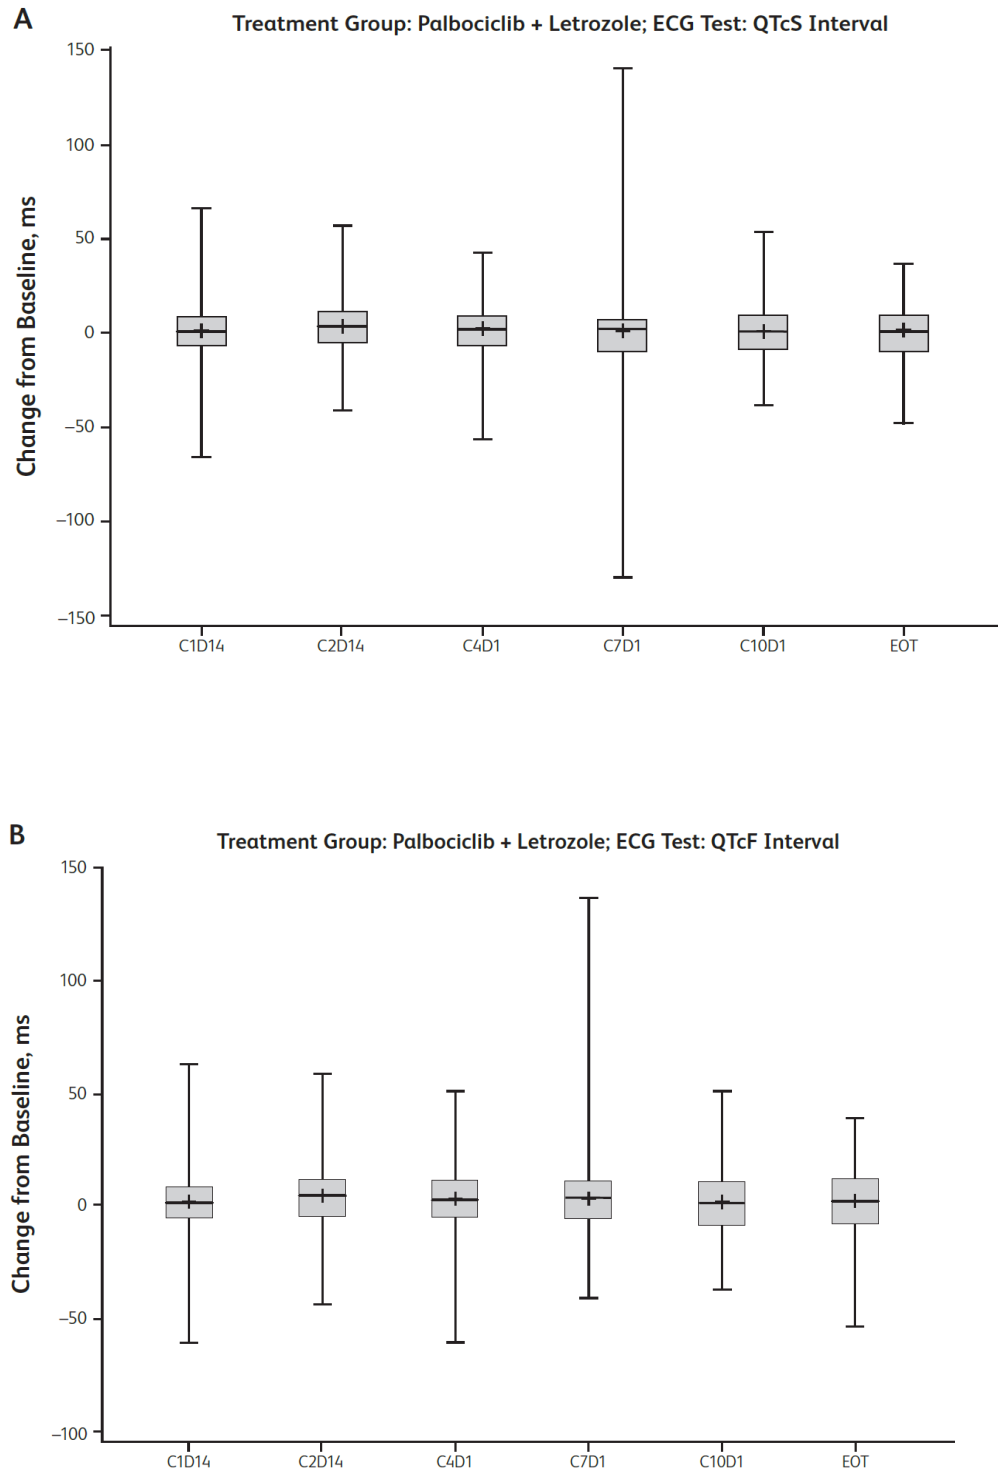

**Supplemental Digital Content 3. Fig. 4:** VPC plot for the final (A) concentration-QTcS model and (B) concentration-QTcF model.

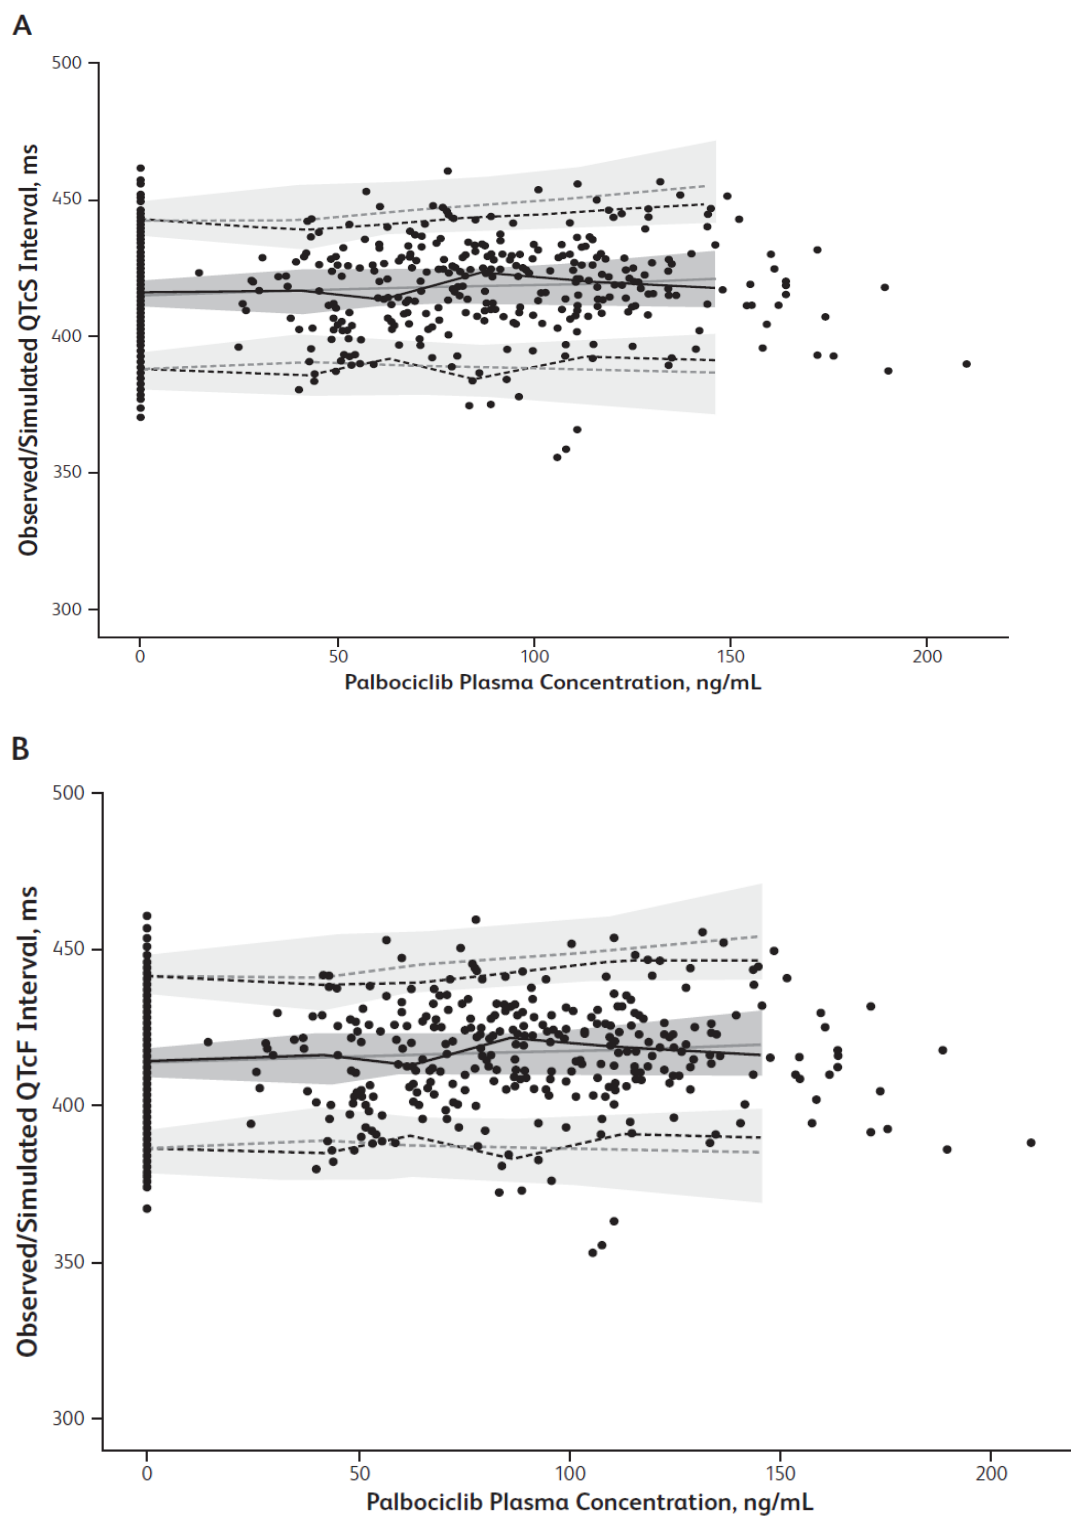

Circles represent observed data, solid black line represents the median of the observed data, and black dashed lines are 2.5<sup>th</sup> and 97.5<sup>th</sup> percentiles of observed data. The gray solid line is the median of the 1000 simulated medians, and the dashed gray lines are 2.5<sup>th</sup> and 97.5<sup>th</sup> percentiles of the simulated values. The shaded regions represent the 95% CIs for the simulated median (dark gray) and each of the simulated 2.5<sup>th</sup> and 97.5<sup>th</sup> percentiles (light gray).
