# Supplementary material for: Palbociclib has no clinically relevant effect on the QTc interval in patients with advanced breast cancer
Source: PubMed Central journal article supplement — Anticancer Drugs. 2018 Feb 15;29(3):271–80. doi: 10.1097/CAD.0000000000000589 (PMC5821476; doi:10.1097/cad.0000000000000589), 2018-02-15
Supplement: cad-29-271-s004.pdf [file cad-29-271-s004.pdf]

**Supplemental Digital Content 4. Table 1:** Categorical Summary of Maximum Postbaseline and Maximum Increase From Baseline of ECG Parameters for Safety-Analysis Population

| Parameter                                  | Criterion       | Palbociclib + |            | Placebo + |            |
|--------------------------------------------|-----------------|---------------|------------|-----------|------------|
|                                            |                 | N             | n (%)      | N         | n (%)      |
| Maximum QTcS, ms                           | <450            | 441           | 355 (80.5) | 220       | 189 (85.9) |
|                                            | 450–<480        | 441           | 79 (17.9)  | 220       | 26 (11.8)  |
|                                            | 480–<500        | 441           | 5 (1.1)    | 220       | 5 (2.3)    |
|                                            | ≥500            | 441           | 2 (0.5)    | 220       | 0          |
| Maximum QTcF, ms                           | <450            | 441           | 379 (85.9) | 220       | 197 (89.5) |
|                                            | 450–<480        | 441           | 54 (12.2)  | 220       | 21 (9.5)   |
|                                            | 480–<500        | 441           | 7 (1.6)    | 220       | 2 (0.9)    |
|                                            | ≥500            | 441           | 1 (0.2)    | 220       | 0          |
| Maximum QTcB, ms                           | <450            | 441           | 286 (64.9) | 220       | 152 (69.1) |
|                                            | 450–<480        | 441           | 142 (32.2) | 220       | 60 (27.3)  |
|                                            | 480–<500        | 441           | 10 (2.3)   | 220       | 7 (3.2)    |
|                                            | ≥500            | 441           | 3 (0.7)    | 220       | 1 (0.5)    |
| Maximum QTcS increase<br>from baseline, ms | Change <30      | 441           | 409 (92.7) | 220       | 208 (94.5) |
|                                            | 30 ≤ change <60 | 441           | 29 (6.6)   | 220       | 12 (5.5)   |
|                                            | Change ≥60      | 441           | 3 (0.7)    | 220       | 0          |
| Maximum QTcF increase<br>from baseline, ms | Change <30      | 441           | 404 (91.6) | 220       | 206 (93.6) |
|                                            | 30 ≤ change <60 | 441           | 35 (7.9)   | 220       | 14 (6.4)   |
|                                            | Change ≥60      | 441           | 2 (0.5)    | 220       | 0          |

|                                                      |                                     |     |            |     |            |
|------------------------------------------------------|-------------------------------------|-----|------------|-----|------------|
| Maximum QTcB increase<br>from baseline, ms           | Change <30                          | 441 | 392 (88.9) | 220 | 201 (91.4) |
|                                                      | 30 ≤ change <60                     | 441 | 45 (10.2)  | 220 | 18 (8.2)   |
|                                                      | Change ≥60                          | 441 | 4 (0.9)    | 220 | 1 (0.5)    |
| Maximum PR interval<br>increase from baseline,<br>ms | Change ≥25% and<br>baseline ≥200 ms | 441 | 0          | 219 | 0          |
|                                                      | Change ≥50% and<br>baseline <200 ms | 441 | 0          | 219 | 0          |
| Maximum QRS complex<br>increase from baseline,<br>ms | Change ≥25% and<br>baseline ≥100 ms | 443 | 2 (0.5)    | 220 | 0          |
|                                                      | Change ≥50% and<br>baseline <100 ms | 443 | 4 (0.9)    | 220 | 1 (0.5)    |

N, number of patients who had at least 1 pair of time-matched baseline and postbaseline ECG data; n, number of subjects in each category.

**Supplemental Digital Content 4. Table 2.** Parameter Estimates for the Final Concentration-  
QTc Models

| Parameter                                                           | Estimate (95% CI)                |                                 |                                  |
|---------------------------------------------------------------------|----------------------------------|---------------------------------|----------------------------------|
|                                                                     | QTcS                             | QTcF                            | QTcB                             |
| Intercept at nominal time 0,<br>$\theta_1$ , ms                     | 414 (410, 418)                   | 412 (408, 416)                  | 426 (422, 431)                   |
| Intercept at nominal time 2,<br>$\theta_2$ , ms                     | 417 (413, 421)                   | 415 (411, 419)                  | 430 (425, 434)                   |
| Intercept at nominal time 4,<br>$\theta_3$ , ms                     | 416 (412, 420)                   | 414 (410, 418)                  | 430 (426, 435)                   |
| Intercept at nominal time 6,<br>$\theta_4$ , ms                     | 415 (411, 419)                   | 414 (410, 417)                  | 430 (426, 434)                   |
| Intercept at nominal time 8,<br>$\theta_5$ , ms                     | 414 (410, 418)                   | 412 (408, 416)                  | 429 (424, 433)                   |
| Slope, $\theta_6$ , ms/ng/mL                                        | 0.0347 (0.00776,<br>0.0616)      | 0.0355 (0.00826,<br>0.0628)     | 0.0272 (−0.000536,<br>0.0549)    |
| IIV-intercept, $\omega_1$ , ms<br>[shrinkage, %]                    | 15.4 [1.29] (13.0,<br>18.4)      | 15.6 [1.29] (13.1,<br>18.5)     | 17.6 [1.27] (14.8,<br>21.0)      |
| IIV-slope, $\omega_2$ , ms/ng/mL<br>[shrinkage, %]                  | 0.0988 [13.0]<br>(0.0795, 0.123) | 0.100 [12.9]<br>(0.0807, 0.125) | 0.0982 [16.0]<br>(0.0771, 0.125) |
| Correlation between slope<br>and intercept, $\omega_1$ - $\omega_2$ | −0.263 (−0.496,<br>0.00559)      | −0.270 (−0.503,<br>−0.000402)   | −0.285 (−0.525,<br>−0.00192)     |

| <b>Parameter</b>              | <b>Estimate (95% CI)</b> |                    |                    |
|-------------------------------|--------------------------|--------------------|--------------------|
|                               | <b>QTcS</b>              | <b>QTcF</b>        | <b>QTcB</b>        |
| Residual error, $\sigma$ , ms | 7.14 [9.38] (6.72,       | 7.21 [9.39] (6.79, | 8.25 [9.07] (7.77, |
| [shrinkage, %]                | 7.58)                    | 7.66)              | 8.76)              |

IIV, interindividual variability.
